# Supplementary material
Source: publisher figshare collection journal article supplement (https://karger.figshare.com/articles/dataset/_/7543160)
Supplement: Supplementary file 1 [file 1]

**Table 1** - Primers used in this study

| Name            | Sequences                                                                                                                                             |
|-----------------|-------------------------------------------------------------------------------------------------------------------------------------------------------|
| <i>tefl</i> -t1 | 5'- <u>GGATCC</u> CGACAGTTGGCTCATCATCCGT-3' (The boxed bases encode <i>Bam</i> HI)                                                                    |
| <i>tefl</i> -t2 | 5'- <u>GTTTCAGGCTTTTTCATGTTTGACGGTGATGTATGGAAG</u> -3' ( The underlined bases are the shared bases )                                                  |
| <i>HPT</i> -t1  | 5'- <u>TCACCGTCAAACATGAAAAAGCCTGAACTCACCG</u> -3' ( The underlined bases are the shared bases )                                                       |
| <i>HPT</i> -t2  | 5'- <u>GTCGAC</u> TAATTCGGGGGATCTGGATTTTAGT-3' (The boxed bases encode <i>Sal</i> I)                                                                  |
| 18S-se          | 5'- <u>GCATGC</u> GCTAAAAACCCCAACTTCGGAAGG-3' (The boxed bases encode <i>Sph</i> I)                                                                   |
| 18S-an          | 5'- <u>GGATGATGAGCCA</u> ACTGTCGGTTCAACTACGAGCT-3' ( The underlined bases are the shared bases )                                                      |
| <i>tefl</i> -se | 5'- <u>TAAAAAGCTCGTAGTTGAACCGACAGTTGGCTCATCAT</u> -3' ( The underlined bases are the shared bases )                                                   |
| <i>tefl</i> -an | 5'-GTTTGACGGTGATGTATGGAAGATTGAGTGAAGTACGG-3'                                                                                                          |
| t1              | 5'- <u>AACACTCTTCTTCCACAT</u> <b>GTTTGACGGTGATGTATGGA</b> -3' ( The underlined bases are extended by PCR and the bold bases are the shared bases )    |
| t2              | 5'- <u>AATAGCACTTAGAACGGCA</u> <b>AACACTCTTCTTCCACATGTTT</b> -3' ( The underlined bases are extended by PCR and the bold bases are the shared bases ) |
| t3              | 5'- <u>AGCCATTGCCAGACCGGCA</u> <b>AATAGCACTTAGAACGG</b> -3' ( The underlined bases are extended by PCR and the bold bases are the shared bases )      |
| t4              | 5'- <u>CTGCAGGAGCTCTCTAGA</u> <b>AGCCATTGCCAGACCG</b> -3' ( The underlined bases are extended by PCR and the bold bases are the shared bases )        |

---

|          |                                                                                                                                                                            |
|----------|----------------------------------------------------------------------------------------------------------------------------------------------------------------------------|
|          | are extended by PCR and the bold bases are the shared bases )                                                                                                              |
| t5       | 5'- <u>CTCGAGGGTACCAAGCTTCTGCAGGAGCTCTCTAGA</u> -3' ( The underlined bases are extended by PCR and the bold bases are the shared bases )                                   |
| t6       | 5'- <u>GTCGAC</u> GATATCCCATGGCTCGAGGGTACCAAG-3' ( The boxed bases encode <i>SalI</i> , The underlined bases are extended by PCR and the bold bases are the shared bases ) |
| 26S-se   | 5'- <u>GGATCC</u> CCAACAGGGATTGC-3' (The boxed bases encode <i>Bam</i> <b>HI</b> )                                                                                         |
| 26S-an   | 5'- <u>GAATTC</u> CAACCATTACGCCAGC-3' (The boxed bases encode <i>Eco</i> <b>RI</b> )                                                                                       |
| INU1-se  | 5'- <u>GAGCTC</u> TCAGTGATCAATTACAAGAGAGATGG-3' (The boxed bases encode <i>SacI</i> )                                                                                      |
| INU1-an  | 5'- <u>GTCGAC</u> TCAAACGTTAAATTGGGTAACGTTA-3' (The boxed bases encode <i>SalI</i> )                                                                                       |
| YIR      | 5' -ACTCTATCAGAGCTTGGTTGACGGC-3'                                                                                                                                           |
| INU RAse | 5'-CACCGTCACCTCCGAAAAC-3'                                                                                                                                                  |
| INU RAan | 5'-GTTGTCGTCGTTGTTACCCTTG-3'                                                                                                                                               |
| AP26S    | 5'- AGCCTTCGGGTTTCGCATTG-3'                                                                                                                                                |
| AP26X    | 5'-CCAGTCACATACGGGATTCTCAC-3'                                                                                                                                              |
| A1       | 5'-GCTAAAAACCCCAACTTCGGAAAGGGGTGTA-3'                                                                                                                                      |
| A2       | 5'-CAACCATTACGCCAGCATCCTAGCCGAAGC-3'                                                                                                                                       |

---
