# Supplementary material
Source: publisher figshare collection journal article supplement (https://karger.figshare.com/articles/dataset/_/7543160)
Supplement: Supplementary file 2 [file 1]

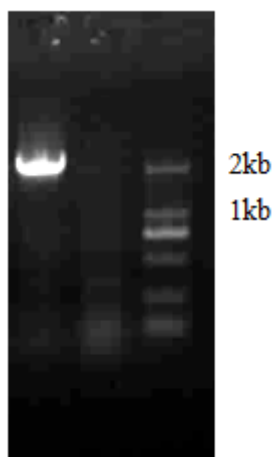

1 2 3

**Supplemental file 1.** The PCR products amplified from the genomic DNA in the transformant API41 (Lane 1) and no PCR products amplified from the genomic DNA from the genomic DNA of *A. melanogenum* strain P10 (Lane 2). Lane 3 was the DNA markers.
