# Supplementary material
Source: publisher figshare collection journal article supplement (https://karger.figshare.com/articles/dataset/_/7543160)
Supplement: Supplementary file 3 [file 1]

Archive with 3 entries (3 files):
- 493139_sm3.pdf
- 493139_sm1.pdf
- 493139_sm2.pdf
