# Supplementary material
Source: publisher figshare collection journal article supplement (https://karger.figshare.com/articles/dataset/_/7543160)
Supplement: Supplementary file 3 [file 1 › 493139_sm2.pdf]

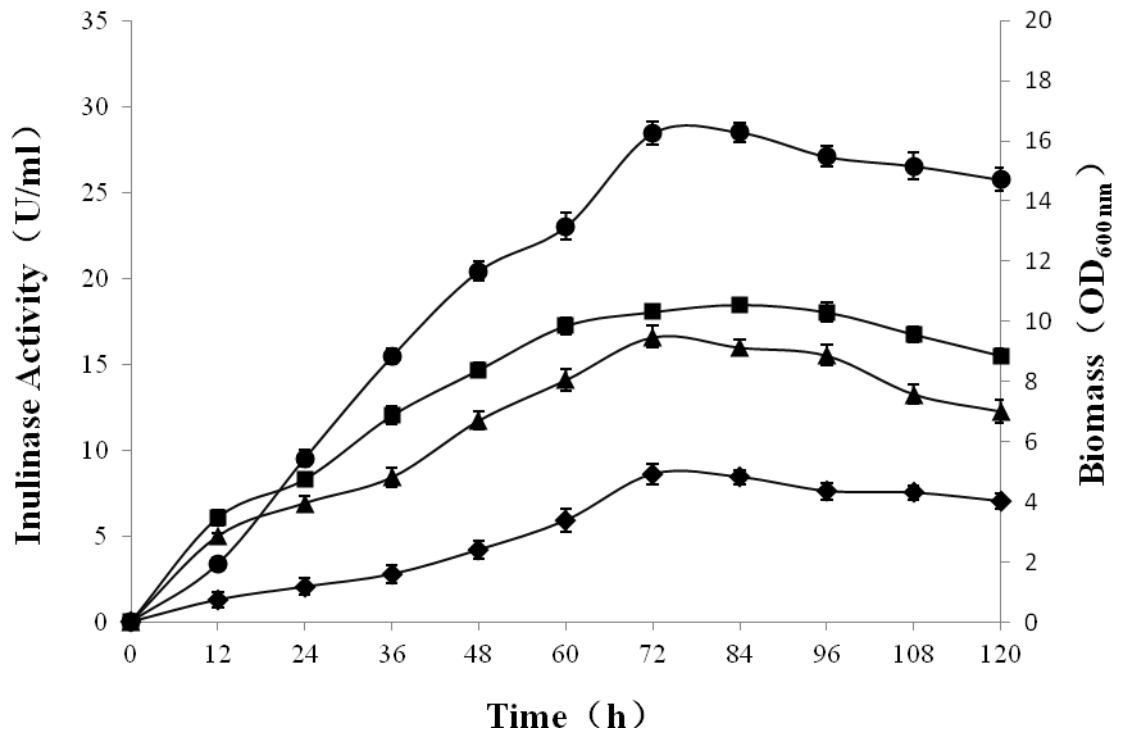

**Supplemental file 2.** Time courses of inulinase production (●) and cell growth (■) by the transformant API41 and inulinase production (◆) and cell growth (▲) by the wild type strain P10. Data are given as mean  $\pm$  SD, n = 3. The shaking speed of the flask was 180 rpm, the cultivation temperature was 28 °C and the cultivation time was 120 h.
